1 **Studies of  $\text{NH}_4^+$  and  $\text{NO}_3^-$  uptake ability of subalpine plants**  
2 **and resource-use strategy identified by their functional traits.**

3 **Grassein F.** <sup>1,2</sup>, Legay N. <sup>3,4,5</sup>, Arnoldi C. <sup>3</sup>, Segura. R. <sup>1,2</sup>, Lâiné P. <sup>1,2</sup>, Lavorel S. <sup>3</sup>, Clément  
4 J.C. <sup>3,6</sup>.

5 <sup>1</sup> Université de Caen Basse-Normandie, UMR 950 Ecophysiologie Végétale, Agronomie et  
6 nutritions N, C, S, Esplanade de la Paix, CS 14032, 14032 CAEN Cedex 5, France

7 <sup>2</sup> INRA, UMR 950 Ecophysiologie Végétale, Agronomie et nutritions N, C, S, Esplanade de  
8 la Paix, CS 14032, 14032 CAEN Cedex 5, France

9 <sup>3</sup> Laboratoire d'Ecologie Alpine, CNRS UMR 5553, Université Joseph Fourier, BP 53, 38041  
10 Grenoble Cedex 09, France

11 <sup>4</sup> Ecole de la Nature et du Paysage, INSA Centre Val de Loire, 9 Rue Chocolaterie, 41000  
12 Blois, France

13 <sup>5</sup> CNRS, CITERES, UMR 7324, 37200 Tours, France

14 <sup>6</sup> CARRTEL, UMR 0042 INRA-Univ. Savoie Mont Blanc, FR-73376, Le Bourget du Lac,  
15 France

16

17

18 Running title: plant N uptake and functional strategy

19

20

21

22 SUMMARY:

23 The leaf economics spectrum (LES) is based on a suite of leaf traits related to plant  
24 functioning and ranges from resource-conservative to resource-acquisitive strategies.  
25 However, the relationships with root traits, and the associated belowground plant  
26 functioning such as N uptake is still poorly known. Additionally, environmental variations  
27 occurring both in time and in space could uncouple LES from root traits. We explored, in  
28 subalpine grasslands, the relationships between leaf and root morphological traits and to  
29 what extent they contribute to the plant resource economics spectrum (RES). We also  
30 investigated the link between this spectrum and N uptake, as well as the variations of N  
31 uptake across different grasslands and during the growing season. Although poorly  
32 correlated with leaf traits, root traits contributed to a RES at the whole plant level. Higher  
33  $\text{NH}_4^+$  and  $\text{NO}_3^-$  uptake abilities were associated with the resource-acquisitive strategy.  
34 Nonetheless, N uptake within species varied between grasslands and during the growing  
35 season, suggesting that LES and plant traits are good, but still incomplete, descriptors of  
36 plant functioning. Soil environmental variations between grasslands or during the growing  
37 season may also drive to some extent the N uptake ability of species. Our results support  
38 the current efforts to build a more general framework including above- and below-ground  
39 processes when studying plant community functioning.

40 Keywords: Leaf and root traits, Nitrate and ammonium uptake, plant assimilation, Resource  
41 use strategy, Subalpine grasslands

## 42 Introduction

43 Functional traits have been widely used to describe different plant strategies. One major axis  
44 of specialisation involves a trade-off between conservation of resources in well protected and  
45 long lived tissues, and acquisition of resources by tissue with high use-efficiency and turn-  
46 over, and commonly referred as the leaf economic spectrum (LES, Wright *et al.* 2004). More  
47 specifically, species with an exploitative strategy share similar leaf attributes such as high  
48 specific leaf area (SLA) and nitrogen concentrations (LNC) that have been associated with  
49 short leaf life-span, high photosynthetic capacity (PNUE) as well as high decomposability  
50 (Reich *et al.* 1998, Cornwell *et al.* 2008). And the conservation/acquisition strategies have  
51 been numerous linked to plant ecology, fast-growing exploitative species dominating in  
52 nutrient rich environment while the slow-growing conservative species are more common in  
53 poor or harsh conditions (Chapin 1980, Lambers & Poorter 1992, Ordonez *et al.* 2009).  
54 Despite some evidences of a similar contribution of root traits to the plant strategy (Roumet *et*  
55 *al.* 2006, Freschet *et al.* 2010, Fort *et al.* 2013), the importance of root traits is less understood  
56 than for leaf traits, mainly because weak correlations between analogous leaf and root traits  
57 have been reported (Craine *et al.* 2005, Tjoelker *et al.* 2005, Freschet *et al.* 2010), and also  
58 because root functioning is often overlooked compared to leaves in field conditions.

59 Nutrient uptake ability is one of the main functions provided by roots, and both physiological  
60 and morphological adjustments are involved at the root level to support changes in nutrient  
61 shoot demand (Chapin 1980, Hodge 2004, James *et al.* 2009). Nutrient uptake is indeed  
62 influenced both by anatomical properties of roots involved in the prospection such as specific  
63 root length, as well as physiological adjustments such as kinetic parameters like maximal  
64 uptake rate ( $V_{max}$ , but see Bassirirad 2000). Among nutrients, nitrogen is one of the most  
65 well studied one, especially its inorganic forms ( $\text{NO}_3^-$  and  $\text{NH}_4^+$ ) both for plants and for  
66 ecosystem functioning. However, rarely have morphological and physiological properties of

67 root been assessed simultaneously in field conditions, whereas some supports come from  
68 species grown in standardized conditions (Maire et al. 2009, Grassein et al. 2015). Nitrogen  
69 uptake can indeed be influenced by several environmental factors justifying the use of  
70 controlled conditions to estimate uptake parameters in a comparative purpose. For example,  
71 nitrogen uptake has been reported to vary in response to temperature or pH (Garnett and  
72 Smethurst 1999). Nevertheless, N uptake ability also differs between species, and is partially  
73 related to plant strategy and their functional traits (Grassein et al. 2015), but these results need  
74 to be validated for plant grown in natural conditions.

75 Subalpine grasslands are subject to the combined effects of climate and anthropogenic factors,  
76 both influencing N cycling and thus N availability for organisms (Bardgett *et al.* 2005, Legay  
77 *et al.* 2013). Decreased management intensity favours plant species with resource  
78 conservative traits (Quétier *et al.* 2007), which are usually associated with fungal-dominated  
79 belowground communities (de Vries *et al.* 2012, Grigulis *et al.* 2013). Concomitantly, it slows  
80 down N cycling (Zeller *et al.* 2000, Robson *et al.* 2010), favouring the accumulation of soil  
81 ammonium ( $\text{NH}_4^+$ ) rather than soil nitrate ( $\text{NO}_3^-$ ) (Robson *et al.* 2007). Plants growing in such  
82 variable conditions are likely to adjust their N uptake ability, as it has been shown for  
83 functional traits (Quétier *et al.* 2007, Grassein et al. 2010). Although measuring only a net N  
84 uptake, which is the result of influx and efflux, the direct measurement of N uptake using  
85 excised roots allows to characterise the uptake kinetics for  $\text{NO}_3^-$  and  $\text{NH}_4^+$  of several species  
86 while controlling the environmental variations and thus making it possible to compare  
87 different species at the cost to lose some of ecological meanings (Lucash et al. 2007). This  
88 method could thus be applied to plants collected in the field in order to complement previous  
89 *in situ* field studies in the investigation on the links between functional traits (leaf and roots)  
90 and N uptake ability for species where environmental constraints were free to influence plant

91 performance and likely to differ between aboveground and belowground organs (Craine et al.  
92 2005).

93 In this study, we investigated the relationships between functional traits and inorganic N  
94 uptake for three perennial grass species with contrasted LES. Because soil inorganic N  
95 availability and plant N uptake ability are likely to vary across seasons and in response to  
96 management (Jaeger *et al.* 1999, Miller *et al.* 2009), we examined these relationships for  
97 individuals occurring in grasslands with different management and throughout the growing  
98 season, thereby testing their temporal consistency. Using the excised roots method for root N  
99 uptake estimation, and measuring functional traits for leaves and roots, we tested the  
100 following hypotheses: (1) the root traits are also contributing to the economics spectrum  
101 observed for leaf traits, (2) and more exploitative species should be more efficient to take up  
102 N. As functional traits are influenced by environmental conditions, we hypothesise that N  
103 uptake will be influenced by environmental variations (3) between grasslands, as well as  
104 during the growing season, probably following N availability, both in quantity and in quality  
105 depending on the most abundant form.

106

107 Material and methods

108 Study site and species

109 The study site is located in the upper Romanche valley of the central French Alps between the  
110 village of Villar d'Arène and the Lautaret Pass. The climate is subalpine with a strong  
111 continental influence. Winters are cold and snowy, with monthly average minimum  
112 temperatures of -15.9°C in February, maximum monthly average temperature of 23.8°C in  
113 July, and mean annual precipitation of 956mm (unpublished data, [sajf.ujf-grenoble.fr](http://sajf.ujf-grenoble.fr)). The

114 growing season starts following snow melt in late April - early May and continues until late  
115 September or October depending on the date of the first snow in autumn.

116 Given the hypothesis that  $\text{NH}_4^+$  and  $\text{NO}_3^-$  uptake could be an important hard plant trait related  
117 to resource use strategy (as suggested by soft structural and morphological traits) and to field  
118 dominance, and due to the degree of precision chosen for N uptake estimations (see 2.2), a  
119 compromise was necessary regarding the number of species, grasslands and replicates to be  
120 investigated. This sampling adjustment was required to conduct N uptake estimations for all  
121 individuals in a brief enough time period so that most abiotic factors remained as comparable  
122 as possible (soil moisture, temperature, radiation).

123 We chose three common and dominant grass species, *Dactylis glomerata* L., *Bromus erectus*  
124 Huds and *Festuca paniculata* Schinz and Tell. All species are perennial, arbuscular  
125 mycorrhizal non-dependent species and span a gradient from more exploitative (*D.*  
126 *glomerata*) to more conservative (*F. paniculata*) resource use strategies (Grassein et al. in  
127 press). Four grasslands (Table 1), described in Quétier *et al.* (2007), were chosen for their  
128 contrasting past and current management, and were similar to the grasslands studied by  
129 Robson *et al.* (2007, 2010) : (i) Terrace Mown and Fertilized (TMF), (ii) Terrace Unmown  
130 not fertilized but lightly grazed (TU), (iii) Un-terraced Mown grassland (UM) and (iv) Un-  
131 terraced Unmown but lightly grazed grassland (UU), representing a gradient of decreasing  
132 management intensity. To reflect field dominance patterns, *D. glomerata* was sampled in  
133 TMF, *B. erectus* in TU, *F. paniculata* in UM, and all three species were sampled in UU where  
134 they coexist, although *F. paniculata* was dominant (Table 1).

135 To assess N uptake patterns over the growing season, the same sampling design was repeated  
136 twice during 2010. At each date for each species and grassland, we sampled the roots and soil  
137 (approximately: 25x25x25 cm) of five individuals (genetically distinct individuals at least 2m  
138 apart). The first sampling corresponded to the peak biomass and targeted flowering onset (just

139 before anthesis), and the second sampling corresponded to autumn after last management  
140 activities occurred. For *D. glomerata* in TMF and *B. erectus* in TU, the two sampling dates  
141 were mid-June and mid-September. For *F. paniculata* in UM and the three species in UU, the  
142 sampling dates were: early July and early September. These two dates are called "Summer"  
143 and "Autumn" hereafter. As much as possible, species were sampled at the same time the day  
144 to avoid any diurnal variation in N uptake (Gessler et al. 1998).

145

#### 146 Soil nitrogen pools

147 At each date and for each grassland, soil nitrogen concentrations were measured from six soil  
148 cores (dimensions 4.5 cm Ø, 10 cm deep) kept on ice in the field and maintained at 4°C upon  
149 return to the laboratory (within 2h). Soils were sieved through a 5.6-mm mesh to remove roots  
150 and stones. A subsample of 10g fresh sieved soil was prepared for extraction of inorganic N in  
151 0.5M K<sub>2</sub>SO<sub>4</sub>, and analysed using a colorimetric analyser (FS-IV autoanalyser (OI-Analytical,  
152 College Station, TX, USA) (following Bowman *et al.* 2003) to measure soil concentrations of  
153 ammonium (NH<sub>4</sub><sup>+</sup>), nitrate (NO<sub>3</sub><sup>-</sup>) and Total Dissolved Nitrogen (TDN). Soil aliquots were  
154 used to determine soil water (7 days at 70°C) and soil organic matter contents (550°C during  
155 4 hours). Finally, soil subsamples were air-dried to measure soil pH, or ground to a fine  
156 powder for measurements of total carbon (C) and N contents using an elemental analyser  
157 (FlashEA 1112, Thermo Fisher Scientific Inc., Waltham, MA, USA).

158 At each date, five individuals of each species, with roots and soil, were excavated from each  
159 field and transferred within half an hour to the laboratory located at the Lautaret Pass (Station  
160 Alpine Joseph Fourier). Living and young fine roots were washed with deionised water, cut to  
161 2-cm length and stored in 1mM CaSO<sub>4</sub> for less than two hours to limit the uptake decline

162 starting around three hours after excision (Louahlia *et al.* 2000). Root samples from each  
163 individual were separated into 14 sub-samples of approximately 0.5g fresh mass.

164

#### 165 Functional traits

166 Functional traits were measured for roots and leaves using standardised protocols  
167 (Cornelissen *et al.* 2003). Two of the individual root sub-samples were used to estimate root  
168 dry matter content (RDMC), specific root length (SRL, Winrhizo® software, fresh length per  
169 unit of dry mass), and were further analysed to obtain root-<sup>15</sup>N natural abundance and root  
170 nitrogen concentration (RNC, N mass per unit of dry mass). Specific leaf area (SLA, fresh  
171 area per unit of dry mass), leaf and root dry matter contents (LDMC and RDMC, dry mass per  
172 unit of fresh mass), leaf nitrogen concentration (LNC, N mass per unit of dry mass) and  
173 specific root length (SRL, Winrhizo® software, fresh length per unit of dry mass) were also  
174 measured.

175

#### 176 Nitrogen uptake estimation: the “excised” roots method

177 Root N uptake kinetics started within 60 min after excision, thereby avoiding the potential  
178 decline in N uptake ability reported to start after 3h (Louahlia *et al.* 2000). Nitrate and  
179 ammonium uptake by plants involved mainly the transport system called HATS (High  
180 Affinity Transport System). It contributes to N uptake at low to moderate concentrations of  
181 external N (<1mM) and saturates at 0.2-0.5 mM (Kronzucker *et al.* 2000, Min *et al.* 2000),  
182 which makes it the more likely system used by plants growing in natural and semi-natural  
183 ecosystems limited by N (Bassirirad 2000, Maire *et al.* 2009). The estimation of the maximum  
184  $\text{NH}_4^+$  and  $\text{NO}_3^-$  uptake rates by HATS requires a range of N concentrations below 1mM at  
185 which the  $V_{\text{max}}$  can be reached depending on species (Grassein *et al.* 2015). Consequently,



186 uptake was estimated from the accumulation of  $^{15}\text{N}$  in root sub-samples incubated for one  
187 hour in a buffer solution (pH = 5.5- following Leon *et al.* (1995)), containing a range of N  
188 concentrations (20, 50, 100, 250, 500 and 1000  $\mu\text{M}$ ). Six sub-samples were incubated in  
189  $\text{K}^{15}\text{NO}_3$  and the other six in  $(^{15}\text{NH}_4)_2\text{SO}_4$  with a  $^{15}\text{N}$  excess of 99% atom. The two N forms  
190 were tested individually in order to avoid possible interactions (Kronzucker *et al.* 1999)  
191 Solution volumes and fresh weights were selected to avoid N depletion during the experiment.  
192 After 1h incubation, roots were washed twice for one minute with a 1mM  $\text{CaSO}_4$  at  $4^\circ\text{C}$  to  
193 stop any metabolic processes. Roots were then dried at  $60^\circ\text{C}$  for 72h, ground to a fine powder  
194 and analysed by IRMS at the University of Caen (Isoprime GV instruments, Stockport, UK)  
195 to obtain  $^{15}\text{N}$  Atom% and N concentrations.

196

#### 197 Data analysis

198 Nitrogen Uptake Rate (NUR) was calculated for each concentration and each inorganic N  
199 form ( $\text{NH}_4^+$  and  $\text{NO}_3^-$ ) using the  $^{15}\text{N}$  increase in the root incubated compared to the non-  
200 incubated control, and expressed by unit of time and dry mass ( $\text{nmolN}\cdot\text{h}^{-1}\cdot\text{g}^{-1}$  of dry roots, see  
201 Leon *et al.* 1995). The dependence of NUR on substrate concentration was fitted for each  
202 individual and Hanes's relations (Michaelis transformation) was used to estimate the  
203 maximum uptake rate ( $V_{\text{max}}$ ) defined as the maximum NUR for  $\text{NH}_4^+$  and  $\text{NO}_3^-$  (Leon *et al.*  
204 1995). Finally, the  $\text{NH}_4^+:\text{NO}_3^-$  uptake ratio was calculated as the ratio between  $\text{NH}_4^+ V_{\text{max}}$   
205 and  $\text{NO}_3^- V_{\text{max}}$ .

206 A principal component analysis (PCA) was performed using all plant functional traits at the  
207 individual level to describe their functional strategy based on leaf and root traits.  
208 Relationships between functional traits of leaves and roots, and uptake ability were  
209 investigated using Pearson correlation coefficients. Relationships between the functional

210 strategy and N uptake at the root level were tested using regression analyses between the N  
211 uptake parameters ( $V_{max}$  and  $K_m$ ) and the first PCA.

212 Comparisons of uptake parameters for species, fields and date were conducted with ANOVA  
213 followed by Tukey tests to compare species and grasslands. Similarly, we used ANOVA and  
214 Tukey post hoc test to test soil parameters differences between grasslands and dates. Data  
215 were log-transformed when necessary to achieve normality and heteroscedasticity.

216 All statistical analyses were performed using the software R 2.14.0 (R Core team  
217 2012), with multivariate analyses (PCA) being performed using the package Ade4 (Dray &  
218 Dufour 2007).

219

## 220 Results

221 We observed large variations for leaf and root functional traits in spite of a restricted number  
222 of species in our study (Table 2). The range of variation was similar to, and sometimes even  
223 higher than the variability reported in Fort *et al.* (2013) for a larger set of species occurring in  
224 a similar ecosystem, including *D. glomerata* and *B. erectus*. The PCA of functional traits  
225 highlighted a first axis explaining 62.1% of the total variance (Fig. 1). The three species  
226 differed significantly for their mean position along this axis ( $p=0.012$ ), with positive values  
227 for *D. glomerata* and negative values for *F. paniculata*. Positive values along this axis were  
228 characterised by high SLA, LNC and SRL, and low LDMC. Among these, SLA and LNC  
229 have been reported as major contributors to a resource economic spectrum establishing the  
230 existence of a fundamental trade-off between plant features allowing resource capture and  
231 those allowing resource conservation.

232 This functional axis was positively correlated to  $\text{NH}_4^+$  and  $\text{NO}_3^-$   $V_{max}$  (Fig 2a and 2b) and  
233 negatively to  $\text{NH}_4^+:\text{NO}_3^-$  uptake ratio (Fig 2c) indicating a more pronounced preference for

234  $\text{NH}_4^+$  at lower values of axis 1. Except RDMC, all traits taken separately were poorer  
235 predictors of the  $\text{NO}_3^-$  and  $\text{NH}_4^+$  maximum uptake rates than this functional axis, although the  
236 first PCA axis was significantly correlated with all functional traits (Table 3).

237 In UU grassland,  $\text{NH}_4^+$  Vmax in summer was similar for the three species (Fig. 3a) but greater  
238 for *D. glomerata* for  $\text{NO}_3^-$  Vmax ( $p < 0.001$ , Fig. 3b). Vmax in autumn for both N forms was  
239 lower for *F. paniculata* compared to the two other species ( $\text{NH}_4^+$   $p < 0.05$ ,  $\text{NO}_3^-$   $p < 0.001$ ).  
240 Comparing the different grasslands within species, we observed reduced  $\text{NO}_3^-$  and  $\text{NH}_4^+$   
241 Vmax values in the UU grassland for *D. glomerata* (in summer and in autumn) and *B. erectus*  
242 (summer) compared to the other grasslands. On the other hand, highest  $\text{NH}_4^+$  Vmax for *B.*  
243 *erectus* and *F. paniculata* were found in UU during the autumn. Illustrating the seasonal  
244 variability, all species in the UU grassland had higher  $\text{NH}_4^+$  maximum uptake rates in the  
245 autumn than in the summer, as well as higher  $\text{NO}_3^-$  uptake for *B. erectus*.  $\text{NH}_4^+:\text{NO}_3^-$  uptake  
246 ratio did not vary in time, but always showed higher values in the UU for the three species  
247 compared to the other grasslands, and overall greater values for *F. paniculata* (Fig. 4).

248 Within species, a limited number of traits were significantly different between grasslands  
249 (Table 2). We only observed significant differences in autumn, with highest LDMC in TU for  
250 *B. erectus*, highest LDMC and RDMC in UU for *D. glomerata*, and highest LDMC but lowest  
251 SRL for *F. paniculata* in UM. However, changes in response to the season were more  
252 consistent among species and grasslands, with an increase of LDMC and a decrease of SLA in  
253 autumn compared to the summer. We also observed higher LNC for *D. glomerata* and *F.*  
254 *paniculata* during the summer than during the autumn in TMF and UM respectively, and  
255 higher RDMC during the autumn for *D. glomerata* in UU.

256 Since all species occurred in the UU grasslands, we choose to focus on soil parameters from  
257 this grassland. UU and UM only differ for SWC in autumn (Table 4), all other soil variables  
258 were similar between these two grasslands, which had similar past land-use history (Table1).

259 UU had consistently higher SWC and SOM, and lower soil pH and CN ratio than TMF and  
260 TU. All grasslands had similar soil  $\text{NH}_4^+$  concentrations. During the summer, we observed  
261 higher TDN and  $\text{NH}_4^+:\text{NO}_3^-$  soil ratio, and lower soil  $\text{NO}_3^-$  concentration in UU compared to  
262 TMF and TU, but we did not find these differences in autumn.

263

264 Discussion:

265 Relationships between leaf and root traits

266 In the aim to find parallels between above and below-ground organs (e.g. Roumet et al. 2006),  
267 several studies have investigated the relationships between analogous traits measured for  
268 leaves and roots. While positive relationships have been reported for SLA vs SRL (Craine &  
269 Lee 2003, Craine et al. 2005, Freschet et al. 2010), other studies have reported a lack of  
270 relationships between SLA vs SRL (Craine et al. 2001, Tjoelker et al. 2005). Consequently,  
271 the absence of relationships in our study between SRL/SLA, LDMC/RDMC and LNC/RNC  
272 was not unexpected, although our limited number of species/replicates could explain a  
273 reduced number of significant relationships.

274 Nevertheless, we observed similar trade-offs at the leaf and root levels between traits, namely  
275 N concentration and dry matter content. A similar spectra of resource use at the leaf and root  
276 levels has already been reported (Freschet et al. 2010), despite a relatively low degree of  
277 relationships between analogous traits belowground and aboveground. Different selective  
278 pressure for leaf and root traits as well as specialisation for the acquisition of different  
279 resources (e.g. light vs nutrient) could explain this absence of association between  
280 belowground and aboveground traits (Craine et al. 2005, Liu et al. 2010), while the global  
281 strategy at the plant level could remain the same since high efficiency for light or for nutrients  
282 could be related to the same physiological adaptation, as pointed out previously for stress

283 tolerance (Chapin 1980). However, leaf functional traits had been shown to have a limited  
284 power to predict N uptake at the root level (Craine & Lee 2003), and root traits remain more  
285 informative for this purpose.

286

287

288

289 Relationship between N maximum uptake rate ( $V_{max}$ ) and plant strategy

290 Our results showed that a stronger exploitative syndrome (higher SRL, SLA, LNC and lower  
291 RDMC) was associated with higher  $V_{max}$  for both inorganic N forms, rejecting the  
292 hypothesis of a trade-off between maximum uptake rate of each N forms (ref ou). Indeed,  
293 ammonium toxicity has been reported for some plant species (review in Britto & Kronzucker  
294 2002), as well as negative interactions between the uptake of  $NH_4^+$  and  $NO_3^-$  (Kronzucker et  
295 al. 1999), and this could promote a trade-off in the acquisition of  $NH_4^+$  and  $NO_3^-$  between  
296 species (Maire et al. 2009). Here, we estimated  $NH_4^+$  and  $NO_3^-$  uptake independently to avoid  
297 such interactions during measurements, and our results did not support a trade-off but rather  
298 suggest a synergistic uptake of both N forms. Provision of  $NO_3^-$  has been demonstrated to  
299 alleviate the  $NH_4^+$  toxicity (Britto & Kronzucker 2002), and even to favour  $NH_4^+$  uptake. We  
300 indeed observed higher uptakes for  $NH_4^+$  than for  $NO_3^-$ , indicating a preference of all species  
301 for  $NH_4^+$ , especially for individuals with a more conservative syndrome of traits. Besides,  
302 more exploitative plants have a lower preference for  $NH_4^+$  compared to more conservative  
303 individuals, but expressed higher maximal uptake rates than more conservative individuals for  
304 both N forms.

305 Overall, changes in functional leaf traits related to a higher potential photosynthesis efficiency  
306 and light capture appeared to be associated at the root level with higher N maximal uptake

307 rates for both N forms, eventhough leaf traits alone appeared as a poor predictors of N uptake  
308 (Craine & Lee 2003).

309

310 Nitrogen uptake variations in response to management and sampling dates

311 Nitrogen uptake rate is usually considered as a property of plant species, but little is  
312 known about variation in within-species N uptake rates in grasslands with different land-use  
313 history and at different times during the growing season. In our study, we observed that  
314 nitrogen uptake rates could differ strongly for the same species in different grasslands (e.g. *B.*  
315 *erectus* and *D. glomerata* in the UU grassland). On the other hand, the time of the year also  
316 influenced the N uptake rates of all species, with for example an opposite response between  
317 grasslands for *B. erectus* depending on the sampling date. Overall, grasslands were weakly  
318 discriminated by functional traits, suggesting that other factors such as soil parameters may  
319 explain the within species N uptake differences between grasslands.

320 Nitrogen uptake can vary depending on the amount of N available in the soil (Gavito  
321 et al. 2001). Soil  $\text{NH}_4^+$  concentration, the main N source taken up by plants in our study, was  
322 similar in the four investigated grasslands, whereas a higher soil TDN was measured in the  
323 UU grassland. Consequently, the lower N uptake rates observed in this grassland cannot be  
324 explained by a lower N availability. As reported by previous studies, subalpine grasslands can  
325 show the legacy effects of former management activities, leading to slower N cycling (Zeller  
326 et al. 2000, Robson et al. 2007). Indeed, we observed lower pH and higher soil water and  
327 organic matter contents in the UU grassland suggesting variations in N cycling and in the  
328 quality of the available N, not only in its quantity (Garnett & Smethurst 1999, Robson et al.  
329 2010). Supporting this hypothesis, we observed variations in soil  $\text{NO}_3^-$  concentrations, and  
330 consequently soil  $\text{NH}_4^+:\text{NO}_3^-$  ratio, between the studied grasslands. Although we could not

331 directly relate *in situ* soil parameters to N plant uptake estimated under “controlled”  
332 conditions, we interestingly observed parallel changes for  $\text{NH}_4^+$  uptake and soil  $\text{NH}_4^+:\text{NO}_3^-$   
333 ratio in grasslands where individuals have been sampled. For example, both *B. erectus*  $\text{NH}_4^+$   
334 uptake and soil  $\text{NO}_3^-$  concentration were lower during the summer and higher during the  
335 autumn in TU than in UU.

336 Rarely investigated in natural ecosystems, experimental evidences on cultivated plants  
337 have demonstrated the effects of soil  $\text{NH}_4^+:\text{NO}_3^-$  ratio concentration on plant N uptake  
338 (Errebhi & Wilcox 1990, Bar-Tal et al. 2001). Yet, the effects were largely species-dependent  
339 and trade off were sometime reported between  $\text{NH}_4^+$  and  $\text{NO}_3^-$  uptakes (Warncke & Barber  
340 1973, Kronzucker et al. 1999, Maire et al. 2009). The preferential uptake for an inorganic N  
341 form could also be influenced by environmental and physiological factors (Britto &  
342 Kronzucker 2013). Our results did not support any trade-off in the intrinsic ability of plant  
343 species to take up both N forms, even after removing possible environmental conditions or  
344 interactions between N forms. Although we could not directly test for the relationship  
345 between soil parameters and plant N uptake rates, differences between grasslands in the N  
346 uptake within species highlight that management practices may have important effects on  
347 plant N uptake, likely through N cycling changes and the quality of N pool available as already  
348 pointed out by previous studies (Zeller et al. 2000, Robson et al. 2007). Other studies have  
349 suggested that N preference could be dependent of the soil availability of the different N  
350 forms (Näsholm et al. 2009, Stoelken et al. 2010). While our results partially supported this  
351 hypothesis, with variation within species between different grassland, the different species  
352 sampled in the same grassland showed differences in their  $\text{NH}_4^+:\text{NO}_3^-$  uptake ratio, supporting  
353 the hypothesis that this “preference” is partially related to the strategy of species, or at least to  
354 species identity. But overall, more exploitative species with higher maximum uptake rates for

355 one N form is also likely to have high uptake rates for other N forms (Kastovska &  
356 Santruckova 2011).

357         Nevertheless, the plant preference for N forms is a complex topic (Britto &  
358 Kronzucker 2013), and careful considerations should be given to the environmental  
359 conditions where the species occur. Since N cycling is controlled by a large set of parameters  
360 such as pH, soil humidity, land-use, short and long-term variations in the predominant N  
361 forms available for plants are to be expected. Under some conditions, plants can also take up  
362 organic N (amino acids) directly and/or through fungi (Näsholm et al. 2000). While we  
363 assumed that this source of N is of limited importance for our species in our relatively fertile  
364 grasslands (Jones et al. 2005, Kahmen et al. 2009), a full understanding of the N preference,  
365 and discussion about species coexistence through N forms sharing, would require careful  
366 investigations, beyond the possibility in our study. Nonetheless, the variability we observed in  
367 | the ratio of uptake between the inorganic N forms suggested that, to some extent, plant  
368 | physiology was adjusted to match the soil conditions where species occurred. Yet, differences  
369 between species with different strategies remains, with higher uptake for both forms  
370 associated with a more exploitative strategy. We hypothesised that this should be also the case  
371 for organic N sources (Kastovska and Santruckova 2011). Nevertheless, we acknowledge that  
372 this question could be more important in harsh environments where organic N is relatively  
373 more abundant as a N source for plants (Modzer et al 2014). Further investigations remain  
374 needed on the variations of plant N uptake under field conditions, in link with potential  
375 variations in N cycling in response to land-use or during the season (Robson et al. 2010,  
376 Legay et al. 2013).

377

378 Variations of N uptake ability during the growing season



379 Plant N uptake ability also varies during the growing season, with N uptake increasing  
380 (Stahl et al. 2011) or decreasing (Jaeger et al. 1999) depending on the ecosystems  
381 investigated. In the UU grassland,  $\text{NH}_4^+$  uptake was higher for all species during the autumn  
382 than during the summer, and the same was found for  $\text{NO}_3^-$  uptake by *B. erectus*. Plant activity  
383 is usually considered to slow down during the autumn compared to the peak biomass in  
384 summer, an assumption supported by higher LDMC and lower SLA for all species related to  
385 the senescence of leaves. However, we did not observe any changes for root traits, suggesting  
386 that roots could remain active during this time of the growing season, especially in the process  
387 of resource storage, an important feature for subalpine/alpine plants (Jaeger and Manson  
388 1992, Kleijn et al. 2005). Additionally, studies have reported an increase of grasslands N  
389 cycling rate in the autumn that could be explained by more favourable soil conditions (first  
390 rains and mild temperature), and associated with still active N uptake by plants as observed in  
391 our study (Grogan and Jonasson 2003, Miller et al. 2009, Larsen et al. 2012). Despite the fact  
392 that only few soil parameters differed between seasons in the UU grassland, the N uptake  
393 increase in autumn was more likely a site-dependent effect related to soil conditions (Miller et  
394 al. 2009, Stahl et al. 2011, Legay et al. 2013) rather than a species response since they did  
395 show the same pattern in the other grasslands.

396

## 397 Conclusions

398 By estimating inorganic root N uptake under controlled conditions from plants grown up  
399 under field conditions, our results support the assumption that root and leaf functional traits  
400 are associated with the ability of plants to acquire N. In particular, the observed pattern for  
401 roots characteristics appeared similar to the one observed in the leaf economic spectrum, with  
402 higher N uptake associated with more exploitative syndrome of traits. However, a weak  
403 relationship between leaf and root traits suggests that leaf traits alone were insufficient to

404 predict N uptake. Additionally, N uptake varied within species during the growing season and  
405 in response to local conditions, making root traits and soil parameters important features of  
406 the relationships between plant functioning and grasslands N cycling.

407

408 Acknowledgements:

409 We wish to thank Marie-Paule Bataille for IRMS analyses. The authors thank the “Conseil  
410 Régional de Basse-Normandie” for the funding of a postdoctoral position to FG. This study  
411 was conducted as part of ERA-Net BiodivERsA project VITAL, ANR-08-BDVA-008.

412 References

- 413 Bahn M., Knapp M., Garajova Z., Pfahringer N., Cernusca A. (2006) Root respiration in  
414 temperate mountain grasslands differing in land use. *Global Change Biology* **12**:995–  
415 1006.
- 416 Bardgett R.D., Bowman W.D., Kaufmann R., Schmidt S.K. (2005) A temporal approach to  
417 linking aboveground and belowground ecology. *Trends in Ecology & Evolution*  
418 **20**:634–641.
- 419 Bardgett R.D., Streeter T.C., Bol R. (2003) Soil microbes compete effectively with plants  
420 for organic-nitrogen inputs to temperate grasslands. *Ecology* **84**:1277–1287.
- 421 Bardgett R.D., Streeter T.C., Cole L., Hartley I.R. (2002) Linkages between soil biota,  
422 nitrogen availability, and plant nitrogen uptake in a mountain ecosystem in the  
423 Scottish Highlands. *Applied Soil Ecology* **19**:121–134.
- 424 Bassirirad H. (2000) Kinetics of nutrient uptake by roots: responses to global change. *New*  
425 *Phytologist* **147**:155–169.
- 426 Britto D.T., Kronzucker H.J. (2002) NH<sub>4</sub><sup>+</sup> toxicity in higher plants: a critical review. *Journal*  
427 *of Plant Physiology* **159**:567–584.
- 428 Britto D.T., Kronzucker H.J. (2013) Ecological significance and complexity of N-source  
429 preference in plants. *Annals of Botany* **112**:957–963.
- 430 Chapin F.S. (1980) The Mineral Nutrition of Wild Plants. *Annual Review of Ecology and*  
431 *Systematics* **11**:233–260.
- 432 Cornelissen J.H.C., Lavorel S., Garnier E., Díaz S., Buchmann N., Gurvich D.E., Reich P.B.,  
433 Steege H. ter, Morgan H.D., Heijden M.G.A. van der, Pausas J.G., Poorter H. (2003)  
434 A handbook of protocols for standardised and easy measurement of plant functional  
435 traits worldwide. *Aust J Bot* **51**:335–380.
- 436 Cornwell W.K., Cornelissen J.H.C., Amatangelo K., Dorrepaal E., Eviner V.T., Godoy O.,  
437 Hobbie S.E., Hoorens B., Kurokawa H., Pérez-Harguindeguy N., Queded H.M.,  
438 Santiago L.S., Wardle D.A., Wright I.J., Aerts R., Allison S.D., Van Bodegom P.,  
439 Brovkin V., Chatain A., Callaghan T.V., Díaz S., Garnier E., Gurvich D.E., Kazakou  
440 E., Klein J.A., Read J., Reich P.B., Soudzilovskaia N.A., Vaieretti M.V., Westoby M.  
441 (2008) Plant species traits are the predominant control on litter decomposition rates  
442 within biomes worldwide. *Ecology Letters* **11**:1065–1071.
- 443 Craine J.M., Froehle J., Tilman D.G., Wedin D.A., Chapin I.I.I. (2001) The relationships  
444 among root and leaf traits of 76 grassland species and relative abundance along  
445 fertility and disturbance gradients. *Oikos* **93**:274–285.
- 446 Craine J.M., Lee W.G. (2003) Covariation in leaf and root traits for native and non-native  
447 grasses along an altitudinal gradient in New Zealand. *Oecologia* **134**:471–478.
- 448 Craine J.M., Lee W.G., Bond W.J., Williams R.J., Johnson L.C. (2005) Environmental  
449 constraints on a global relationship among leaf and root traits of grasses. *Ecology*  
450 **86**:12–19.

- 451 Dray S., Dufour A.-B. (2007) The ade4 Package: Implementing the Duality Diagram for  
452 Ecologists. *Journal of Statistical Software* **22** [online] URL:  
453 <http://ideas.repec.org/a/jss/jstsof/22i04.html> (accessed 13 January 2014).
- 454 Errebhi M., Wilcox G.E. (1990) Tomato growth and nutrient uptake pattern as influenced by  
455 nitrogen form ratio. *Journal of Plant Nutrition* **13**:1031–1043.
- 456 Fort F., Jouany C., Cruz P. (2013) Root and leaf functional trait relations in Poaceae species:  
457 implications of differing resource-acquisition strategies. *Journal of Plant Ecology*  
458 **6**:211–219.
- 459 Freschet G.T., Cornelissen J.H.C., Van Logtestijn R.S.P., Aerts R. (2010) Evidence of the  
460 “plant economics spectrum” in a subarctic flora. *Journal of Ecology* **98**:362–373.
- 461 Garnett T.P., Smethurst P.J. (1999) Ammonium and nitrate uptake by *Eucalyptus nitens*:  
462 effects of pH and temperature. *Plant and Soil* **214**:133–140.
- 463 Gavito M.E., Curtis P.S., Mikkelsen T.N., Jakobsen I. (2001) Interactive effects of soil  
464 temperature, atmospheric carbon dioxide and soil N on root development, biomass and  
465 nutrient uptake of winter wheat during vegetative growth. *Journal of Experimental*  
466 *Botany* **52**:1913–1923.
- 467 Grassein F., Lemauviel-Lavenant S., Lavorel S., Bahn M., Bardgett R.D., Desclos-Theveniau  
468 M., Laine P. Relationship between functional traits and inorganic nitrogen acquisition  
469 among eight contrasting European grass species. *Annals of Botany* **In press**
- 470 Grigulis K., Lavorel S., Krainer U., Legay N., Baxendale C., Dumont M., Kastl E., Arnoldi  
471 C., Bardgett R.D., Poly F., Pommier T., Schloter M., Tappeiner U., Bahn M., Clément  
472 J.-C. (2013) Relative contributions of plant traits and soil microbial properties to  
473 mountain grassland ecosystem services. *Journal of Ecology* **101**:47–57.
- 474 Jaeger C.H., Monson R.K. (1992) Adaptive significance of nitrogen storage in *Bistorta*  
475 *bistortoides*, an alpine herb. *Oecologia* **92**:578–585.
- 476 Jaeger C.H., Monson R.K., Fisk M.C., Schmidt S.K. (1999) Seasonal partitioning of nitrogen  
477 by plants and soil microorganisms in an alpine ecosystem. *Ecology* **80**:1883–1891.
- 478 Kahmen A., Livesley S.J., Arndt S.K. (2009) High potential, but low actual, glycine uptake of  
479 dominant plant species in three Australian land-use types with intermediate N  
480 availability. *Plant and Soil* **325**:109–121.
- 481 Kronzucker H.J., Siddiqi M.Y., Glass A.D.M., Kirk G.J.D. (1999) Nitrate-Ammonium  
482 Synergism in Rice. A Subcellular Flux Analysis. *Plant Physiology* **119**:1041–1046.
- 483 Laine P., Ourry A., Macduff J., Boucaud J., Salette J. (1993) Kinetic parameters of nitrate  
484 uptake by different catch crop species: effects of low temperatures or previous nitrate  
485 starvation. *Physiologia Plantarum* **88**:85–92.
- 486 Leffler A.J., James J.J., Monaco T.A. (2013) Temperature and functional traits influence  
487 differences in nitrogen uptake capacity between native and invasive grasses.  
488 *Oecologia* **171**:51–60.
- 489 Legay N., Grassein F., Robson T.M., Personeni E., Bataillé M.-P., Lavorel S., Clément J.-C.

- 490 (2013) Comparison of inorganic nitrogen uptake dynamics following snowmelt and at  
491 peak biomass in subalpine grasslands. *Biogeosciences Discuss* **10**:8887–8917.
- 492 Léon M., Lainé P., Ourry A., Boucaud J. (1995) Increased uptake of native soil nitrogen by  
493 roots of *Lolium multiflorum* Lam. after nitrogen fertilization is explained by a  
494 stimulation of the uptake process itself. *Plant and Soil* **173**:197–203.
- 495 Liu G., Freschet G.T., Pan X., Cornelissen J.H.C., Li Y., Dong M. (2010) Coordinated  
496 variation in leaf and root traits across multiple spatial scales in Chinese semi-arid and  
497 arid ecosystems. *New Phytologist* **188**:543–553.
- 498 Louahlia S., Lainé P., Thornton B., Ourry A., Boucaud J. (2000) The role of N-remobilisation  
499 and the uptake of NH<sub>4</sub><sup>+</sup> and NO<sub>3</sub><sup>-</sup> by *Lolium perenne* L. in laminae growth following  
500 defoliation under field conditions. *Plant and Soil* **220**:175–187.
- 501 Lucash M.S., Eissenstat D.M., Joslin J.D., McFarlane K.J., Yanai R.D. (2007) Estimating  
502 nutrient uptake by mature tree roots under field conditions: challenges and  
503 opportunities. *Trees* **21**:593–603.
- 504 Maire V., Gross N., Da Silveira Pontes L., Picon-Cochard C., Soussana J. (2009) Trade-off  
505 between root nitrogen acquisition and shoot nitrogen utilization across 13 co-occurring  
506 pasture grass species. *Functional Ecology* **23**:668–679.
- 507 McCormack L., Adams T.S., Smithwick E.A.H., Eissenstat D.M. (2012) Predicting fine root  
508 lifespan from plant functional traits in temperate trees. *New Phytologist* **195**:823–831.
- 509 McKane R.B., Johnson L.C., Shaver G.R., Nadelhoffer K.J., Rastetter E.B., Fry B., Giblin  
510 A.E., Kielland K., Kwiatkowski B.L., Laundre J.A., Murray G. (2002) Resource-based  
511 niches provide a basis for plant species diversity and dominance in arctic tundra.  
512 *Nature* **415**:68–71.
- 513 Miller A., Bowman W. (2002) Variation in nitrogen-15 natural abundance and nitrogen  
514 uptake traits among co-occurring alpine species: do species partition by nitrogen  
515 form? *Oecologia* **130**:609–616.
- 516 Miller A.E., Schimel J.P., Sickman J.O., Skeen K., Meixner T., Melack J.M. (2009) Seasonal  
517 variation in nitrogen uptake and turnover in two high-elevation soils: mineralization  
518 responses are site-dependent. *Biogeochemistry* **93**:253–270.
- 519 Mommer L., Weemstra M. (2012) The role of roots in the resource economics spectrum. *New*  
520 *Phytologist* **195**:725–727.
- 521 Quétier F., Thébault A., Lavorel S. (2007) Plant traits in a state and transition framework as  
522 markers of ecosystem response to land-use change. *Ecological Monographs* **77**:33–52.
- 523 R Core Team (2012) *R: A language and environment for statistical computing*. R  
524 Foundation for Statistical Computing, Vienna, Austria. [online] URL: [http://www.R-](http://www.R-project.org/)  
525 [project.org/](http://www.R-project.org/)
- 526 Reich P.B. (2014) The world-wide “fast–slow” plant economics spectrum: a traits manifesto.  
527 *Journal of Ecology* **102**:275–301.
- 528 Reich P.B., Walters M.B., Ellsworth D.S. (1997) From tropics to tundra: Global convergence

- 529 in plant functioning. *Proceedings of the National Academy of Sciences* **94**:13730 –  
530 13734.
- 531 Robson T.M., Baptist F., Clément J., Lavorel S. (2010) Land use in subalpine grasslands  
532 affects nitrogen cycling via changes in plant community and soil microbial uptake  
533 dynamics. *Journal of Ecology* **98**:62–73.
- 534 Robson T.M., Lavorel S., Clement J.-C., Roux X.L. (2007) Neglect of mowing and manuring  
535 leads to slower nitrogen cycling in subalpine grasslands. *Soil Biology and*  
536 *Biochemistry* **39**:930–941.
- 537 Roumet C., Urcelay C., Díaz S. (2006) Suites of root traits differ between annual and  
538 perennial species growing in the field. *New Phytologist* **170**:357–368.
- 539 Ryser P., Lambers H. (1995) Root and leaf attributes accounting for the performance of fast-  
540 and slow-growing grasses at different nutrient supply. *Plant and Soil* **170**:251–265.
- 541 Stahl V.M., Beyschlag W., Werner C. (2011) Dynamic niche sharing in dry acidic grasslands  
542 -a <sup>15</sup>N-labeling experiment. *Plant and Soil* **344**:389–400.
- 543 Bar-Tal A., Aloni B., Karni L., Rosenberg R. (2001) Nitrogen Nutrition of Greenhouse  
544 Pepper. II. Effects of Nitrogen Concentration and NO<sub>3</sub>: NH<sub>4</sub> Ratio on Growth,  
545 Transpiration, and Nutrient Uptake. *HortScience* **36**:1252–1259.
- 546 Tjoelker M.G., Craine J.M., Wedin D., Reich P.B., Tilman D. (2005) Linking leaf and root  
547 trait syndromes among 39 grassland and savannah species. *New Phytologist* **167**:493–  
548 508.
- 549 De Vries F.T., Manning P., Tallowin J.R.B., Mortimer S.R., Pilgrim E.S., Harrison K.A.,  
550 Hobbs P.J., Quirk H., Shipley B., Cornelissen J.H.C., Kattge J., Bardgett R.D. (2012)  
551 Abiotic drivers and plant traits explain landscape-scale patterns in soil microbial  
552 communities. *Ecology Letters* **15**:1230–1239.
- 553 Warncke D.D., Barber S.A. (1973) Ammonium and Nitrate Uptake by Corn (*Zea mays* L.)  
554 as Influenced by Nitrogen Concentration and NH<sub>4</sub><sup>+</sup>/NO<sub>3</sub><sup>-</sup> Ratio. *Agronomy Journal*  
555 **65**:950.
- 556 Withington J.M., Reich P.B., Oleksyn J., Eissenstat D.M. (2006) Comparisons of structure  
557 and life span in roots and leaves among temperate trees. *Ecological Monographs*  
558 **76**:381–397.
- 559 Wright I.J., Reich P.B., Westoby M., Ackerly D.D., Baruch Z., Bongers F., Cavender-Bares  
560 J., Chapin T., Cornelissen J.H.C., Diemer M., Flexas J., Garnier E., Groom P.K.,  
561 Gulias J., Hikosaka K., Lamont B.B., Lee T., Lee W., Lusk C., Midgley J.J., Navas  
562 M.-L., Niinemets U., Oleksyn J., Osada N., Poorter H., Poot P., Prior L., Pyankov  
563 V.I., Roumet C., Thomas S.C., Tjoelker M.G., Veneklaas E.J., Villar R. (2004) The  
564 worldwide leaf economics spectrum. *Nature* **428**:821–827.
- 565 Zeller V., Bahn M., Aichner M., Tappeiner U. (2000) Impact of land-use change on nitrogen  
566 mineralization in subalpine grasslands in the Southern Alps. *Biology and Fertility of*  
567 *Soils* **31**:441–448.

568

569 **Table 1:** Description of the studied grasslands. Past and current land uses describe the former  
 570 and current management of these grasslands (see Quetier et al. 2006 for more information).  
 571 TMF: Terrace Mown and Fertilized, TU: Terrace Unmown not fertilized but lightly grazed,  
 572 TM: Unterraced Mown, UU: Unterraced Unmown but lightly grazed.

573

Field

| label | GPS coordinates               | Sampled species                                                                 | Past Land Use   | Current Land Use        | Elevation |
|-------|-------------------------------|---------------------------------------------------------------------------------|-----------------|-------------------------|-----------|
| TMF   | 45° 2'42.77"N<br>6°20'35.29"E | <i>Dactylis glomerata</i>                                                       | Arable rotation | fertilized hay meadow   | 1800m     |
| TU    | 45° 2'24.74"N<br>6°21'38.15"E | <i>Bromus erectus</i>                                                           | Arable rotation | grazed pasture (sheep)  | 1840m     |
| UM    | 45° 1'58.59"N<br>6°23'0.80"E  | <i>Festuca paniculata</i>                                                       | Hay meadow      | unfertilized hay meadow | 1980m     |
| UU    | 45° 1'55.76"N<br>6°23'1.57"E  | <i>Festuca paniculata</i><br><i>Bromus erectus</i><br><i>Dactylis glomerata</i> | Hay meadow      | grazed pasture (sheep)  | 1960m     |

574

575

**Table 2:** Mean values  $\pm$  standard errors of leaf and root traits for each species, site and sampling time (n=5). For a given trait and species, statistically similar values have the same letter (Tukey post-hoc test). Bold values indicate the season with the highest trait values for a given species in a given grassland.

| Species              | Site | Season | SLA (mm <sup>2</sup> .g <sup>-1</sup> )       | LDMC (mg.g <sup>-1</sup> )                      | LNC (mg.g <sup>-1</sup> )                     | SRL (m.g <sup>-1</sup> )        | RDMC (mg.g <sup>-1</sup> )                     | RNC (mg.g <sup>-1</sup> ) |
|----------------------|------|--------|-----------------------------------------------|-------------------------------------------------|-----------------------------------------------|---------------------------------|------------------------------------------------|---------------------------|
| <i>B. erectus</i>    | TU   | Summer | <b>30.07 <math>\pm</math> 0.8<sup>a</sup></b> | 277.6 $\pm$ 2.1 <sup>c</sup>                    | 21.46 $\pm$ 0.2                               | 249.86 $\pm$ 72.0               | 307.77 $\pm$ 22.4                              | 6.06 $\pm$ 0.1            |
|                      |      | Autumn | 15.43 $\pm$ 1.1 <sup>c</sup>                  | <b>444.06 <math>\pm</math> 16.8<sup>a</sup></b> | 12.09 $\pm$ 0.9                               | 253.58 $\pm$ 34.3               | 303.5 $\pm$ 6.3                                | 7.68 $\pm$ 0.4            |
|                      | UU   | Summer | <b>22.58 <math>\pm</math> 0.7<sup>b</sup></b> | 305.06 $\pm$ 4.2 <sup>c</sup>                   | 15.57 $\pm$ 0.8                               | 328 $\pm$ 74.2                  | 290.82 $\pm$ 21.7                              | 7.17 $\pm$ 0.1            |
|                      |      | Autumn | 16.37 $\pm$ 1 <sup>c</sup>                    | <b>385.1 <math>\pm</math> 11.5<sup>b</sup></b>  | 19.28 $\pm$ 2.7                               | 222.12 $\pm$ 75.4               | 288.32 $\pm$ 21.6                              | 7.87 $\pm$ 0.5            |
| <i>D. glomerata</i>  | TMF  | Summer | <b>34.06 <math>\pm</math> 1.6<sup>a</sup></b> | 248.79 $\pm$ 17.7 <sup>c</sup>                  | <b>32.6 <math>\pm</math> 3.4<sup>a</sup></b>  | 426.22 $\pm$ 60.5               | 232.49 $\pm$ 20.5 <sup>b</sup>                 | 7.28 $\pm$ 0.4            |
|                      |      | Autumn | 20.15 $\pm$ 2 <sup>b</sup>                    | <b>298.51 <math>\pm</math> 2.5<sup>b</sup></b>  | 19.41 $\pm$ 2.2 <sup>b</sup>                  | 290 $\pm$ 48.6                  | 249.09 $\pm$ 8 <sup>b</sup>                    | 7.99 $\pm$ 0.3            |
|                      | UU   | Summer | 26.17 $\pm$ 0.3 <sup>ab</sup>                 | 265.78 $\pm$ 9.1 <sup>bc</sup>                  | <b>24.2 <math>\pm</math> 1.4<sup>ab</sup></b> | 318.69 $\pm$ 63.8               | 254.08 $\pm$ 5.6 <sup>b</sup>                  | 6.91 $\pm$ 0.5            |
|                      |      | Autumn | 24.34 $\pm$ 1.7 <sup>b</sup>                  | <b>389.69 <math>\pm</math> 10.5<sup>a</sup></b> | 21.81 $\pm$ 2.5 <sup>ab</sup>                 | 216.87 $\pm$ 44.7               | <b>304.99 <math>\pm</math> 8.8<sup>a</sup></b> | 7.16 $\pm$ 0.2            |
| <i>F. paniculata</i> | UM   | Summer | <b>23.26 <math>\pm</math> 0.4<sup>a</sup></b> | 232.06 $\pm$ 0.6 <sup>c</sup>                   | <b>20.22 <math>\pm</math> 1.9<sup>a</sup></b> | 195.85 $\pm$ 21.3 <sup>ab</sup> | 300.1 $\pm$ 21.5                               | 5.15 $\pm$ 0.4            |
|                      |      | Autumn | 8.78 $\pm$ 0.5 <sup>b</sup>                   | <b>433.87 <math>\pm</math> 18.8<sup>a</sup></b> | 10.61 $\pm$ 1.4 <sup>b</sup>                  | 153.37 $\pm$ 20.5 <sup>b</sup>  | 369.12 $\pm$ 21.7                              | 4.32 $\pm$ 0.5            |
|                      | UU   | Summer | <b>21.36 <math>\pm</math> 0.9<sup>a</sup></b> | 261.06 $\pm$ 15.6 <sup>c</sup>                  | 14.52 $\pm$ 1.8 <sup>ab</sup>                 | 166.21 $\pm$ 20.7 <sup>ab</sup> | 380.91 $\pm$ 6.4                               | 4.16 $\pm$ 0.1            |
|                      |      | Autumn | 11.76 $\pm$ 1.4 <sup>b</sup>                  | <b>369.71 <math>\pm</math> 7.2<sup>b</sup></b>  | 15.53 $\pm$ 3.6 <sup>ab</sup>                 | 293.71 $\pm$ 54.5 <sup>a</sup>  | 366.84 $\pm$ 23.3                              | 4.31 $\pm$ 0.1            |



**Table 3.** Pearson correlations between  $\text{NH}_4^+$  and  $\text{NO}_3^-$  maximum uptake rates ( $V_{\text{max}}$ ), PCA axes, leaf and root traits. Significant values (p-value <0.05) are indicated in bold.

|                               | $V_{\text{max}}\text{NH}_4^+$ | $V_{\text{max}}\text{NO}_3^-$ | axe1         | axe2         | ratio        | SLA          | LDMC  | SRL          | RDMC         | LNC  |
|-------------------------------|-------------------------------|-------------------------------|--------------|--------------|--------------|--------------|-------|--------------|--------------|------|
| $V_{\text{max}}\text{NO}_3^-$ | <b>0.93</b>                   |                               |              |              |              |              |       |              |              |      |
| axe1                          | <b>0.65</b>                   | <b>0.76</b>                   |              |              |              |              |       |              |              |      |
| axe2                          | -0.28                         | -0.24                         | 0.00         |              |              |              |       |              |              |      |
| ratio                         | -0.46                         | <b>-0.68</b>                  | <b>-0.64</b> | 0.43         |              |              |       |              |              |      |
| SLA                           | 0.37                          | 0.53                          | <b>0.84</b>  | 0.38         | -0.54        |              |       |              |              |      |
| LDMC                          | -0.17                         | -0.26                         | <b>-0.60</b> | <b>-0.74</b> | 0.09         | <b>-0.74</b> |       |              |              |      |
| SRL                           | 0.55                          | <b>0.70</b>                   | <b>0.81</b>  | -0.14        | -0.51        | 0.54         | -0.34 |              |              |      |
| RDMC                          | <b>-0.68</b>                  | <b>-0.77</b>                  | <b>-0.91</b> | 0.31         | <b>0.75</b>  | <b>-0.63</b> | 0.37  | <b>-0.71</b> |              |      |
| LNC                           | <b>0.64</b>                   | <b>0.65</b>                   | <b>0.87</b>  | 0.10         | -0.32        | <b>0.69</b>  | -0.51 | <b>0.66</b>  | <b>-0.74</b> |      |
| RNC                           | <b>0.58</b>                   | <b>0.62</b>                   | <b>0.65</b>  | <b>-0.70</b> | <b>-0.80</b> | 0.34         | 0.08  | 0.50         | <b>-0.83</b> | 0.42 |

**Table 4.** Soil properties (mean values  $\pm$  SE) for each grassland and at each sampling time. No significant difference values between sites at a given date are shown by the same letter (Tukey post-hoc test). Values in bold indicate the highest values when the considered soil parameter was significantly different between dates in a grassland. na: not available because of a sampling issue. nd: not detectable: under the level of sensitivity of the method; TDN: total dissolved nitrogen).

|                                                                                  |        | TMF                                            | TU                                             | UM                             | UU                                             |
|----------------------------------------------------------------------------------|--------|------------------------------------------------|------------------------------------------------|--------------------------------|------------------------------------------------|
| Soil Water                                                                       | Summer | <b>22.33 <math>\pm</math> 0.71<sup>b</sup></b> | <b>18.33 <math>\pm</math> 1.12<sup>c</sup></b> | na                             | <b>34.89 <math>\pm</math> 1.20<sup>a</sup></b> |
| Content (%)                                                                      | Autumn | 11.44 $\pm$ 0.33 <sup>b</sup>                  | 7.25 $\pm$ 0.88 <sup>c</sup>                   | 13.58 $\pm$ 1.18 <sup>b</sup>  | 17.74 $\pm$ 1.54 <sup>a</sup>                  |
| pH                                                                               | Summer | 8.01 $\pm$ 0.04 <sup>a</sup>                   | 8.03 $\pm$ 0.04 <sup>a</sup>                   | n.a.                           | <b>6.31 <math>\pm</math> 0.05<sup>b</sup></b>  |
|                                                                                  | Autumn | 7.98 $\pm$ 0.02 <sup>a</sup>                   | 8.05 $\pm$ 0.04 <sup>a</sup>                   | 5.85 $\pm$ 0.05 <sup>b</sup>   | 6.02 $\pm$ 0.08 <sup>b</sup>                   |
| Soil Organic                                                                     | Summer | 13.16 $\pm$ 0.48 <sup>c</sup>                  | 14.39 $\pm$ 0.93 <sup>b</sup>                  | n.a.                           | 18.42 $\pm$ 0.64 <sup>a</sup>                  |
| Matter (%)                                                                       | Autumn | 12.47 $\pm$ 0.65 <sup>b</sup>                  | 11.38 $\pm$ 0.93 <sup>b</sup>                  | 14.02 $\pm$ 0.43 <sup>ab</sup> | 16.98 $\pm$ 1.29 <sup>a</sup>                  |
| C:N ratio                                                                        | Summer | <b>14.91 <math>\pm</math> 0.35<sup>a</sup></b> | 14.02 $\pm$ 0.64 <sup>a</sup>                  | n.a.                           | 12.10 $\pm$ 0.15 <sup>b</sup>                  |
|                                                                                  | Autumn | 13.46 $\pm$ 0.39 <sup>a</sup>                  | 13.43 $\pm$ 0.64 <sup>ab</sup>                 | 11.63 $\pm$ 0.14 <sup>b</sup>  | 11.74 $\pm$ 0.43 <sup>b</sup>                  |
| TDN ( $\mu\text{gN}\cdot\text{g}^{-1}$<br>soil)                                  | Summer | 20.83 $\pm$ 2.95 <sup>b</sup>                  | 16.85 $\pm$ 1.33 <sup>b</sup>                  | n.a.                           | 55.59 $\pm$ 12.15 <sup>a</sup>                 |
|                                                                                  | Autumn | <b>46.12 <math>\pm</math> 4.44<sup>a</sup></b> | <b>46.13 <math>\pm</math> 4.74<sup>a</sup></b> | 34.54 $\pm$ 1.21 <sup>ab</sup> | 46.65 $\pm$ 6.04 <sup>a</sup>                  |
| NO <sub>3</sub> <sup>-</sup> content<br>( $\mu\text{gN}\cdot\text{g}^{-1}$ soil) | Summer | 3.87 $\pm$ 0.48 <sup>ab</sup>                  | <b>5.63 <math>\pm</math> 0.64<sup>a</sup></b>  | n.a.                           | 2.31 $\pm$ 0.53 <sup>b</sup>                   |
|                                                                                  | Autumn | 2.99 $\pm$ 0.54 <sup>a</sup>                   | 0.54 $\pm$ 0.10 <sup>b</sup>                   | n.d.                           | 1.39 $\pm$ 0.66 <sup>ab</sup>                  |
| NH <sub>4</sub> <sup>+</sup> content<br>( $\mu\text{gN}\cdot\text{g}^{-1}$ soil) | Summer | 11.19 $\pm$ 0.47 <sup>a</sup>                  | 15.43 $\pm$ 1.82 <sup>a</sup>                  | n.a.                           | 12.23 $\pm$ 1.77 <sup>a</sup>                  |
|                                                                                  | Autumn | 10.07 $\pm$ 1.37 <sup>a</sup>                  | 11.54 $\pm$ 1.55 <sup>a</sup>                  | 6.97 $\pm$ 0.94 <sup>a</sup>   | 10.17 $\pm$ 1.92 <sup>a</sup>                  |
| NH <sub>4</sub> <sup>+</sup> :NO <sub>3</sub> <sup>-</sup> ratio                 | Summer | 3.56 $\pm$ 0.65 <sup>b</sup>                   | 2.97 $\pm$ 0.30 <sup>b</sup>                   | n.a.                           | 7.85 $\pm$ 1.62 <sup>a</sup>                   |
|                                                                                  | Autumn | 3.53 $\pm$ 0.36 <sup>b</sup>                   | <b>28.68 <math>\pm</math> 10.7<sup>a</sup></b> | n.d.                           | 12.9 $\pm$ 6.4 <sup>ab</sup>                   |

Figures legends:

**Figure 1.** Principal components analysis (PCA) of functional traits measured for the leaves and roots of three grass species (Be: *Bromus erectus*, Dg: *Dactylis glomerata* and Fp: *Festuca paniculata*), in each grassland with different management (UU: untterraced unmown, UM: untterraced mown, TMF: terraced mown and fertilized, TU: terraced unmown). SLA: Specific leaf area, LDMC: Leaf dry matter content, LNC: Leaf nitrogen content, SRL: Specific root length, RDMC: Root dry matter content, RNC: Root nitrogen content.

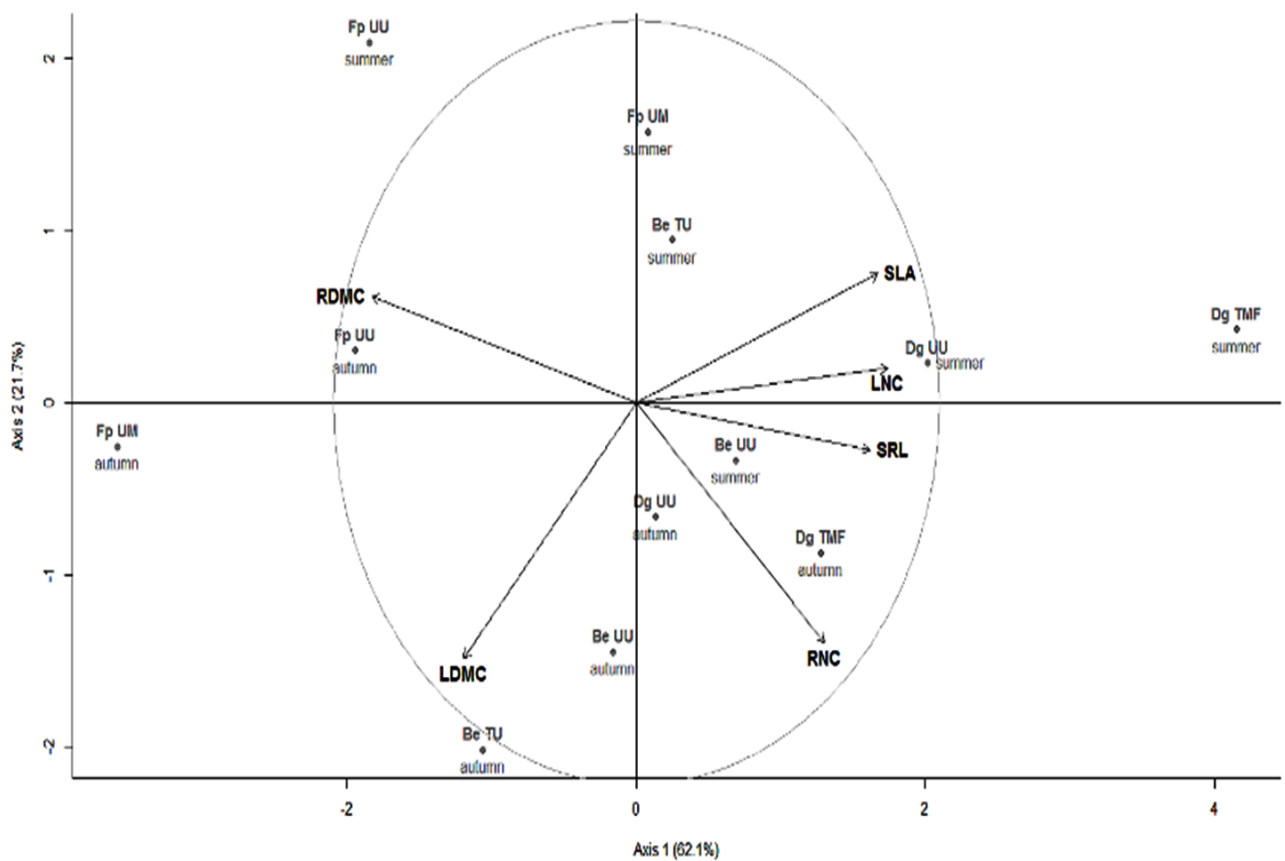

**Figure 2:** Relationships between the first axes of the PCA (fig 1) and  $V_{max}$  for  $\text{NH}_4^+$  (a),  $\text{NO}_3^-$  (b) and  $\text{NH}_4^+:\text{NO}_3^-$  uptake ratio (c). The three relationships were significant ( $p$ -values $<0.05$ ) assuming a polynomial relationship of order=2, and the resulting  $R^2$  are indicated on each graph.

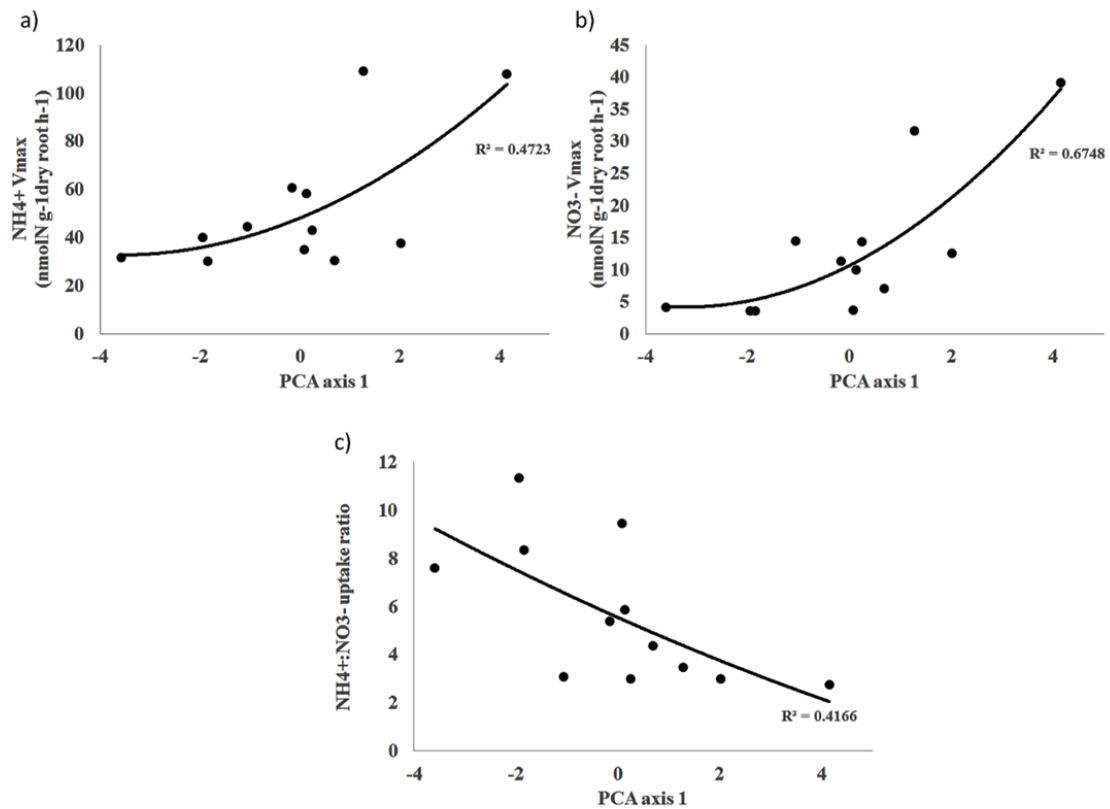

**Figure 3.**  $V_{max}$  (Maximal uptake rate) for  $\text{NH}_4^+$  (a) and  $\text{NO}_3^-$  (b) of *D. glomerata*, *B. erectus* and *F. paniculata*. Within each combination of site and species, dates with the same letter had similar uptake parameters (Tukey post hoc test at 5% level, after an Anova with date as main effect). For each species, the significance of the differences between the two sites for uptake parameters were tested using a Student test, and stars indicate the dates at which the two sites differ significantly with a p-value < 0.05.

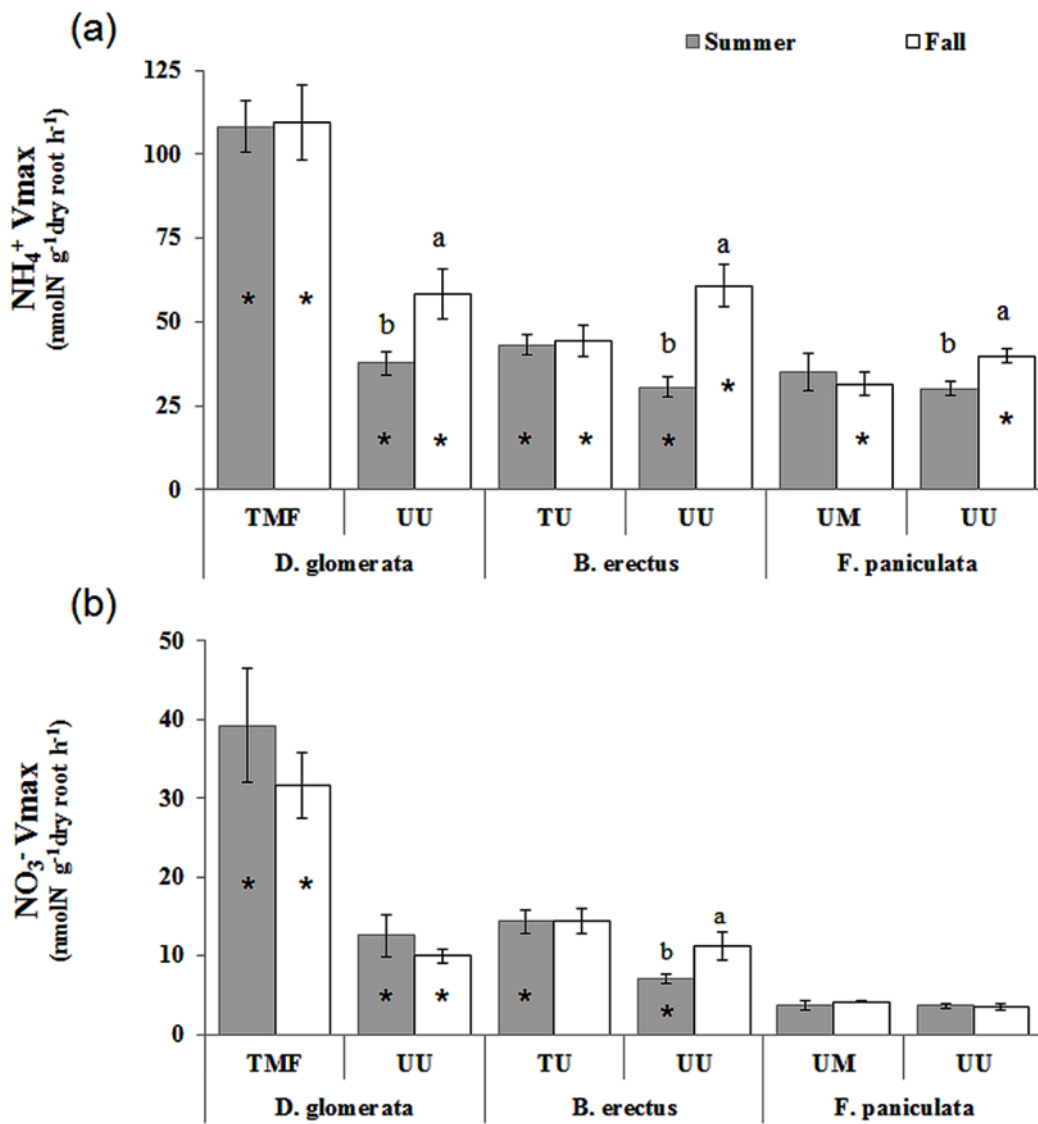

**Figure 4:**  $\text{NH}_4^+:\text{NO}_3^-$  uptake ratio for the three species, in each site and at the two sampling times. The uptake ratio is unitless (ratio between  $\text{NH}_4^+V_{\text{max}}$  and  $\text{NO}_3^-V_{\text{max}}$ ). Similar letters connect species with similar values across grasslands and dates. Pairwise tests were carried out using Tukey post-hoc tests at the error level of 5% following an ANOVA with date, species and site nested within species and the corresponding interactions which were not significant. Within each species, \*or \*\*\* indicate significant site effects ( $p$  value  $< 0.05$  and  $0.001$  respectively) within each species (ANOVA with site, date and the interaction as main effect).

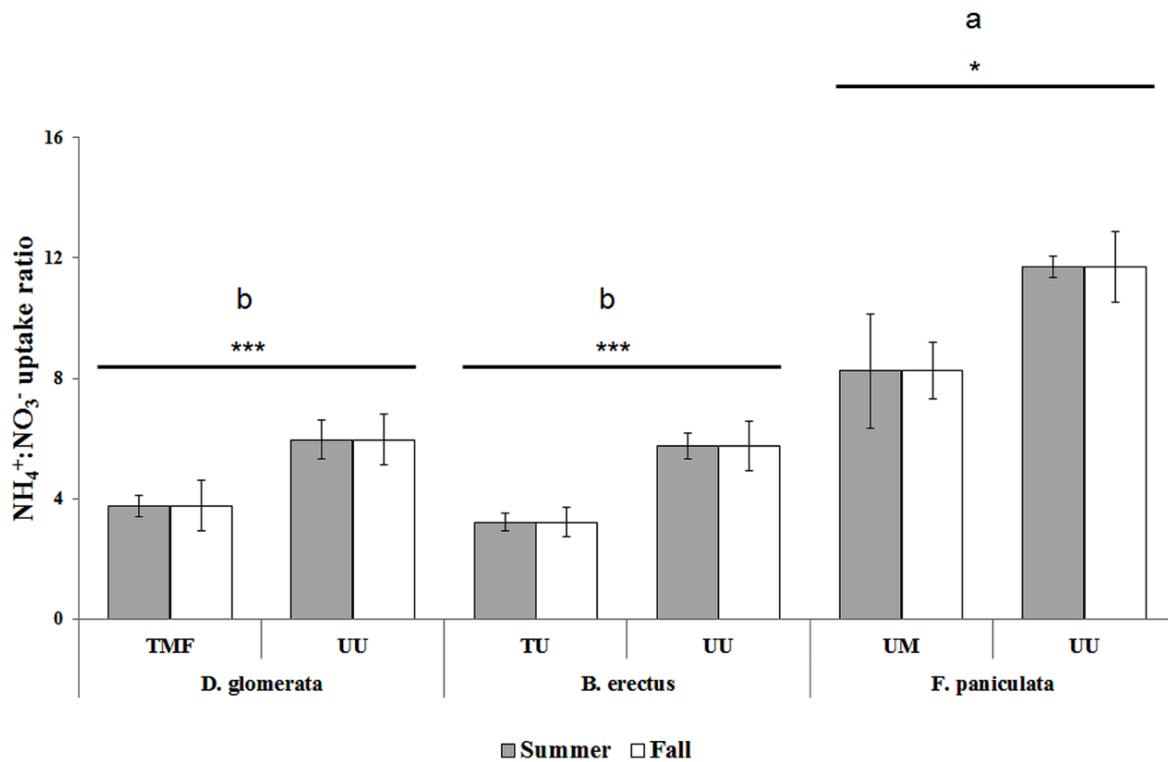

Source: https://www.biorxiv.org/content/10.1101/372235v1.full.pdf
